# Supplementary material for: Effectiveness of workplace exercise interventions in the treatment of musculoskeletal disorders in office workers: a systematic review
Source: PubMed Central journal article supplement — BMJ Open. 2022 Jan 31;12(1):e054288. doi: 10.1136/bmjopen-2021-054288 (PMC8804637; doi:10.1136/bmjopen-2021-054288), 2022-01-31
Supplement: bmjopen-2021-054288supp001.pdf [file bmjopen-2021-054288supp001.pdf]

## Supplementary File 1. Full search strategy

| Database | Search terms                                                                                                                                                                                                                                                                                                                                                                                                                                                                                                                                                                                                                                                                                                                                                                                                                                                                                                                                                                                                                                                                                                                                                                                                                                                                                                                                                                                                                                                                                                                                                                                                                                                                                                                                                                                                                                                                                                                                                                                                                                                                                                                                                                                                                                                                                                                                                                                                                                                                                                                                                                                                                                                                                                                                                                                                                                                                                                                                                                                                                                                                                                                                                                                                                                                                                                                                                                                                                                                                                                                                       |
|----------|----------------------------------------------------------------------------------------------------------------------------------------------------------------------------------------------------------------------------------------------------------------------------------------------------------------------------------------------------------------------------------------------------------------------------------------------------------------------------------------------------------------------------------------------------------------------------------------------------------------------------------------------------------------------------------------------------------------------------------------------------------------------------------------------------------------------------------------------------------------------------------------------------------------------------------------------------------------------------------------------------------------------------------------------------------------------------------------------------------------------------------------------------------------------------------------------------------------------------------------------------------------------------------------------------------------------------------------------------------------------------------------------------------------------------------------------------------------------------------------------------------------------------------------------------------------------------------------------------------------------------------------------------------------------------------------------------------------------------------------------------------------------------------------------------------------------------------------------------------------------------------------------------------------------------------------------------------------------------------------------------------------------------------------------------------------------------------------------------------------------------------------------------------------------------------------------------------------------------------------------------------------------------------------------------------------------------------------------------------------------------------------------------------------------------------------------------------------------------------------------------------------------------------------------------------------------------------------------------------------------------------------------------------------------------------------------------------------------------------------------------------------------------------------------------------------------------------------------------------------------------------------------------------------------------------------------------------------------------------------------------------------------------------------------------------------------------------------------------------------------------------------------------------------------------------------------------------------------------------------------------------------------------------------------------------------------------------------------------------------------------------------------------------------------------------------------------------------------------------------------------------------------------------------------------|
| Pubmed   | <p>1. ("Office Work"[tiab] OR "Office Worker"[tiab] OR "Office Workers"[tiab] OR "Desk Worker"[tiab] OR "Desk Workers"[tiab] OR "Computer Work"[tiab] OR "Computer Workers"[tiab] OR "Nonmanual Workers"[tiab] OR "Administrative Personnel"[MeSH] OR "Administrative Personnel"[tiab] OR "sedentary workers"[tiab] OR "sedentary personnel"[tiab] OR "sedentary employees"[tiab] OR "Work Performance"[MeSH] OR "Work Performance"[tiab] OR "Work Performances"[MeSH] OR "Work Performances"[tiab] OR "Job Performance"[MeSH] OR "Job Performance"[tiab] OR "Job Performances"[MeSH] OR "Job Performances"[tiab] OR "Occupational Diseases"[MeSH] OR "Occupational Disease*"[tiab] OR "Occupational Illness*"[tiab] OR "Administrative Personnel"[MeSH] OR "Administrative Personnel"[tiab] OR "White Collar Worker"[tiab] OR "Administrative Worker"[tiab] OR "Corporate Workers"[tiab] OR "Video Display terminal workers"[tiab] OR "Video Display Visual operators"[tiab] OR "Clerical workers"[tiab])</p> <p>2. ("Musculoskeletal Illness"[MeSH] OR "Musculoskeletal Illness"[tiab] OR "Musculoskeletal Pain"[MeSH] OR "Musculoskeletal Pain"[tiab] OR "Musculoskeletal Pain"[MeSH] OR "Musculoskeletal Pain"[tiab] OR "Musculoskeletal Disease"[MeSH] OR "Musculoskeletal Disease"[tiab] OR "Musculoskeletal Diseases"[MeSH] OR "Musculoskeletal Diseases"[tiab] OR "Musculoskeletal Disorder"[tiab] OR "Musculoskeletal Disorders"[tiab] OR "Musculoskeletal Disfunction"[tiab] OR "Musculoskeletal Disfunctions"[tiab] OR "Low back pain"[MeSH] OR "Low back pain"[tiab] OR "Low back pains"[tiab] OR "Lumbago"[tiab] OR "Lower Back Pain"[tiab] OR "Lower Back pains"[tiab] OR "Low Back Ache"[tiab] OR "Low Back Aches"[tiab] OR "Low Backache"[tiab] OR "Low Backaches"[tiab] OR "Postural Low back pain"[tiab] OR "Posterior Compartment Low back pain"[tiab] OR "Recurrent Low back pain"[tiab] OR "Mechanical Low back pain"[tiab] OR "Neck pain"[MeSH] OR "Neck pain"[tiab] OR "Neck pains"[tiab] OR "Neck Ache"[tiab] OR "NeckAches"[tiab] OR "Cervicalgia"[tiab] OR "Cervicalgias"[tiab] OR "Cervicodynia"[tiab] OR "Cervicodynias"[tiab] OR "Cervical Pain"[tiab] OR "Cervical Pains"[tiab] OR "Posterior Cervical Pain"[tiab] OR "Posterior Cervical Pains"[tiab] OR "Posterior Neck Pain"[tiab] OR "Posterior Neck Pains"[tiab] OR "Anterior Cervical Pain"[tiab] OR "Anterior Cervical Pains"[tiab] OR "Posterior Neck Pain"[tiab] OR "Posterior Neck Pains"[tiab] OR "Shoulder pain"[MeSH] OR "Shoulder pain"[tiab] OR "Shoulder pains"[tiab])</p> <p>3. ("Exercise movement Therapy"[MeSH] OR "Exercise movement Therapy"[tiab] OR "Exercise Therapy"[MeSH] OR "Exercise Therapy"[tiab] OR "Circuit Based Exercise"[MeSH] OR "Circuit Based Exercise"[tiab] OR "Stretching Exercise"[MeSH] OR "Stretching Exercise"[tiab] OR Yoga[MeSH] OR Yoga[tiab] OR "Pilates Training"[tiab] OR "Active Rest"[tiab] OR "Active Rests"[tiab] OR "Active Pause"[tiab] OR "Active Pauses"[tiab] OR "Active Break"[tiab] OR "Active Breaks"[tiab] OR "Exercise Therapies"[tiab] OR "Remedial Exercise"[tiab] OR "Remedial Exercises"[tiab] OR "Rehabilitation Exercise"[tiab] OR "Rehabilitation Exercises"[tiab] OR "Incidental Physical activity"[tiab] OR "Standing breaks"[tiab] OR "Stretching breaks"[tiab] OR "Mobility exercise"[tiab] OR "Workplace exercise intervention"[tiab])</p> <p>4. 1 AND 2 AND 3</p> <p>- Filters/Limits: Publication Date = 1 January 2020 to 31 December 2020; Language = English and Spanish only</p> |
| CINHAL   | <p>1. TI (("Musculoskeletal Illness" OR "Musculoskeletal Pain" OR "Musculoskeletal Pain" OR "Musculoskeletal Disease" OR "Musculoskeletal Diseases" OR "Musculoskeletal Disorder" OR "Musculoskeletal Disorders" OR "Musculoskeletal Disfunction" OR "Musculoskeletal Disfunctions" OR "Low back pain" OR "Low back pains" OR "Lumbago" OR "Lower Back Pain" OR "Lower Back pains" OR "Low Back Ache" OR "Low Back Aches" OR "Low Backache" OR "Low Backaches" OR "Postural Low back pain" OR "Posterior Compartment Low back pain" OR "Recurrent Low back pain" OR "Mechanical Low back pain" OR "Neck pain" OR "Neck pains" OR "Neck Ache" OR "NeckAches" OR "Cervicalgia" OR "Cervicalgias" OR "Cervicodynia" OR "Cervicodynias" OR "Cervical Pain" OR "Cervical Pains" OR "Posterior Cervical Pain" OR "Posterior Cervical Pains" OR "Posterior Neck Pain" OR "Posterior Neck Pains" OR "Anterior Cervical Pain" OR "Anterior</p>                                                                                                                                                                                                                                                                                                                                                                                                                                                                                                                                                                                                                                                                                                                                                                                                                                                                                                                                                                                                                                                                                                                                                                                                                                                                                                                                                                                                                                                                                                                                                                                                                                                                                                                                                                                                                                                                                                                                                                                                                                                                                                                                                                                                                                                                                                                                                                                                                                                                                                                                                                                                              |

|          |                                                                                                                                                                                                                                                                                                                                                                                                                                                                                                                                                                                                                                                                                                                                                                                                                                                                                                                                                                                                                                                                                                                                                                                                                                                                                                                                                                                                                                                                                                                                                                                                                                                                                                                                                                                                                                                                                                                                                                                                                                                                                                                                                                                                                                                                                                                                                                                                                                                                                                                                                                                                                                                                                                                                                                                                                                                                                                                                                                                                                                                                                                                                                                                                                                                                                                                                                                                                                                                                                                                                                                                                                                                                                                                                                                                                    |
|----------|----------------------------------------------------------------------------------------------------------------------------------------------------------------------------------------------------------------------------------------------------------------------------------------------------------------------------------------------------------------------------------------------------------------------------------------------------------------------------------------------------------------------------------------------------------------------------------------------------------------------------------------------------------------------------------------------------------------------------------------------------------------------------------------------------------------------------------------------------------------------------------------------------------------------------------------------------------------------------------------------------------------------------------------------------------------------------------------------------------------------------------------------------------------------------------------------------------------------------------------------------------------------------------------------------------------------------------------------------------------------------------------------------------------------------------------------------------------------------------------------------------------------------------------------------------------------------------------------------------------------------------------------------------------------------------------------------------------------------------------------------------------------------------------------------------------------------------------------------------------------------------------------------------------------------------------------------------------------------------------------------------------------------------------------------------------------------------------------------------------------------------------------------------------------------------------------------------------------------------------------------------------------------------------------------------------------------------------------------------------------------------------------------------------------------------------------------------------------------------------------------------------------------------------------------------------------------------------------------------------------------------------------------------------------------------------------------------------------------------------------------------------------------------------------------------------------------------------------------------------------------------------------------------------------------------------------------------------------------------------------------------------------------------------------------------------------------------------------------------------------------------------------------------------------------------------------------------------------------------------------------------------------------------------------------------------------------------------------------------------------------------------------------------------------------------------------------------------------------------------------------------------------------------------------------------------------------------------------------------------------------------------------------------------------------------------------------------------------------------------------------------------------------------------------------|
|          | <p>Cervical Pains" OR "Posterior Neck Pain" OR "Posterior Neck Pains" OR "Shoulder pain" OR "Shoulder pain" OR "Shoulder pains"))</p> <p>2. AB ((Musculoskeletal Illness" OR "Musculoskeletal Pain" OR "Musculoskeletal Pain" OR "Musculoskeletal Disease" OR "Musculoskeletal Diseases" OR "Musculoskeletal Disorder" OR "Musculoskeletal Disorders" OR "Musculoskeletal Disfunction" OR "Musculoskeletal Disfunctions" OR "Low back pain" OR "Low back pains" OR "Lumbago" OR "Lower Back Pain" OR "Lower Back pains" OR "Low Back Ache" OR "Low Back Aches" OR "Low Backache" OR "Low Backaches" OR "Postural Low back pain" OR "Posterior Compartment Low back pain" OR "Recurrent Low back pain" OR "Mechanical Low back pain" OR "Neck pain" OR "Neck pains" OR "Neck Ache" OR "NeckAches" OR "Cervicalgia" OR "Cervicalgias" OR "Cervicodynia" OR "Cervicodynias" OR "Cervical Pain" OR "Cervical Pains" OR "Posterior Cervical Pain" OR "Posterior Cervical Pains" OR "Posterior Neck Pain" OR "Posterior Neck Pains" OR "Anterior Cervical Pain" OR "Anterior Cervical Pains" OR "Posterior Neck Pain" OR "Posterior Neck Pains" OR "Shoulder pain" OR "Shoulder pain" OR "Shoulder pains"))</p> <p>3. TI (("Office Work" OR "Office Worker" OR "Office Workers" OR "Desk Worker" OR "Desk Workers" OR "Computer Work" OR "Computer Workers" OR "Nonmanual Workers" OR "Administrative Personnel" OR "sedentary workers" OR "sedentary personnel" OR "sedentary employees" OR "Work Performance" OR "Work Performances" OR "Job Performance" OR "Job Performances" OR "Occupational Diseases" OR "Occupational Disease*" OR "Occupational Illness*" OR "Administrative Personnel" OR "White Collar Worker" OR "Administrative Worker" OR "Corporate Workers" OR "Video Display terminal workers" OR "Video Display Visual operators" OR "Clerical workers"))</p> <p>4. AB (("Office Work" OR "Office Worker" OR "Office Workers" OR "Desk Worker" OR "Desk Workers" OR "Computer Work" OR "Computer Workers" OR "Nonmanual Workers" OR "Administrative Personnel" OR "sedentary workers" OR "sedentary personnel" OR "sedentary employees" OR "Work Performance" OR "Work Performances" OR "Job Performance" OR "Job Performances" OR "Occupational Diseases" OR "Occupational Disease*" OR "Occupational Illness*" OR "Administrative Personnel" OR "White Collar Worker" OR "Administrative Worker" OR "Corporate Workers" OR "Video Display terminal workers" OR "Video Display Visual operators" OR "Clerical workers"))</p> <p>5. TI (("Exercise Movement Therapy" OR "Exercise Therapy" OR "Circuit Based Exercise" OR "Stretching Exercise" OR Yoga OR "Pilates Training" OR "Active Rest" OR "Active Rests" OR "Active Pause" OR "Active Pauses" OR "Active Break" OR "Active Breaks" OR "Exercise Therapies" OR "Remedial Exercise" OR "Remedial Exercises" OR "Rehabilitation Exercise" OR "Rehabilitation Exercises" OR "Incidental Physical Activity" OR "Standing Breaks" OR "Stretching Breaks" OR "Mobility Exercise" OR "Workplace Exercise Intervention"))</p> <p>6. AB (("Exercise Movement Therapy" OR "Exercise Therapy" OR "Circuit Based Exercise" OR "Stretching Exercise" OR Yoga OR "Pilates Training" OR "Active Rest" OR "Active Rests" OR "Active Pause" OR "Active Pauses" OR "Active Break" OR "Active Breaks" OR "Exercise Therapies" OR "Remedial Exercise" OR "Remedial Exercises" OR "Rehabilitation Exercise" OR "Rehabilitation Exercises" OR "Incidental Physical Activity" OR "Standing Breaks" OR "Stretching Breaks" OR "Mobility Exercise" OR "Workplace Exercise Intervention"))</p> <p>7. 1 OR 2 AND 3 OR 4 AND 5 OR 6</p> <p>- Filters/Limits: Publication Date = 1 January 2020 to 31 December 2020; Language = English and Spanish only</p> |
| Cochrane | <p>1. (("Musculoskeletal Illness" OR "Musculoskeletal Pain" OR "Musculoskeletal Pain" OR "Musculoskeletal Disease" OR "Musculoskeletal Diseases" OR "Musculoskeletal Disorder" OR "Musculoskeletal Disorders" OR "Musculoskeletal Disfunction" OR "Musculoskeletal Disfunctions" OR "Low back pain" OR "Low back pains" OR "Lumbago" OR "Lower Back Pain" OR "Lower Back pains" OR "Low Back Ache" OR "Low Back Aches" OR "Low Backache" OR "Low Backaches" OR "Postural Low back pain" OR "Posterior Compartment Low back pain" OR "Recurrent Low back pain" OR "Mechanical Low back pain" OR "Neck pain" OR "Neck pains" OR "Neck Ache" OR "NeckAches" OR "Cervicalgia" OR "Cervicalgias" OR "Cervicodynia" OR "Cervicodynias" OR "Cervical Pain" OR "Cervical Pains" OR "Posterior Cervical Pain" OR "Posterior Cervical Pains" OR "Posterior Neck Pain" OR "Posterior Neck Pains" OR "Anterior Cervical Pain" OR "Anterior</p>                                                                                                                                                                                                                                                                                                                                                                                                                                                                                                                                                                                                                                                                                                                                                                                                                                                                                                                                                                                                                                                                                                                                                                                                                                                                                                                                                                                                                                                                                                                                                                                                                                                                                                                                                                                                                                                                                                                                                                                                                                                                                                                                                                                                                                                                                                                                                                                                                                                                                                                                                                                                                                                                                                                                                                                                                                                                 |

|         |                                                                                                                                                                                                                                                                                                                                                                                                                                                                                                                                                                                                                                                                                                                                                                                                                                                                                                                                                                                                                                                                                                                                                                                                                                                                                                                                                                                                                                                                                                                                                                                                                                                                                                                                                                                                                                                                                                                                                                                                                                                                                                                                                                                                                                                                                                                                                                                                                                                          |
|---------|----------------------------------------------------------------------------------------------------------------------------------------------------------------------------------------------------------------------------------------------------------------------------------------------------------------------------------------------------------------------------------------------------------------------------------------------------------------------------------------------------------------------------------------------------------------------------------------------------------------------------------------------------------------------------------------------------------------------------------------------------------------------------------------------------------------------------------------------------------------------------------------------------------------------------------------------------------------------------------------------------------------------------------------------------------------------------------------------------------------------------------------------------------------------------------------------------------------------------------------------------------------------------------------------------------------------------------------------------------------------------------------------------------------------------------------------------------------------------------------------------------------------------------------------------------------------------------------------------------------------------------------------------------------------------------------------------------------------------------------------------------------------------------------------------------------------------------------------------------------------------------------------------------------------------------------------------------------------------------------------------------------------------------------------------------------------------------------------------------------------------------------------------------------------------------------------------------------------------------------------------------------------------------------------------------------------------------------------------------------------------------------------------------------------------------------------------------|
|         | <p>Cervical Pains" OR "Posterior Neck Pain" OR "Posterior Neck Pains" OR "Shoulder pain" OR "Shoulder pain" OR "Shoulder pains")):ti,ab,kw</p> <p>2. (("Office Work" OR "Office Worker" OR "Office Workers" OR "Desk Worker" OR "Desk Workers" OR "Computer Work" OR "Computer Workers" OR "Nonmanual Workers" OR "Administrative Personnel" OR "sedentary workers" OR "sedentary personnel" OR "sedentary employees" OR "Work Performance" OR "Work Performances" OR "Job Performance" OR "Job Performances" OR "Occupational Diseases" OR "Occupational Disease*" OR "Occupational Illness*" OR "Administrative Personnel" OR "White Collar Worker" OR "Administrative Worker" OR "Corporate Workers" OR "Video Display terminal workers" OR "Video Display Visual operators" OR "Clerical wokers")):ti,ab,kw</p> <p>3. (("Exercise movement Therapy" OR "Exercise Therapy" OR "Circuit Based Exercise" OR "Stretching Exercise" OR Yoga OR "Pilates Training" OR "Active Rest" OR "Active Rests" OR "Active Pause" OR "Active Pauses" OR "Active Break" OR "Active Breaks" OR "Exercise Therapies" OR "Remedial Exercise" OR "Remedial Exercises" OR "Rehabilitation Exercise" OR "Rehabilitation Exercises" OR "Incidental Physical Activity" OR "Standing Breaks" OR "Stretching Breaks" OR "Mobility Exercise" OR "Workplace Exercise Intervention")):ti,ab,kw</p> <p>4. 1 AND 2 AND 3</p> <p>- Filters/Limits: Publication Date = 1 January 2020 to 31 December 2020; Language = English and Spanish only</p>                                                                                                                                                                                                                                                                                                                                                                                                                                                                                                                                                                                                                                                                                                                                                                                                                                                                                                                                     |
| Scopus  | <p>1. TITLE-ABS-KEY ("Musculoskeletal Illness" OR "Musculoskeletal Pain" OR "Musculoskeletal Pain" OR "Musculoskeletal Disease" OR "Musculoskeletal Diseases" OR "Musculoskeletal Disorder" OR "Musculoskeletal Disorders" OR "Musculoskeletal Disfunction" OR "Musculoskeletal Disfunctions" OR "Low back pain" OR "Low back pains" OR "Lumbago" OR "Lower Back Pain" OR "Lower Back pains" OR "Low Back Ache" OR "Low Back Aches" OR "Low Backache" OR "Low Backaches" OR "Postural Low back pain" OR "Posterior Compartment Low back pain" OR "Recurrent Low back pain" OR "Mechanical Low back pain" OR "Neck pain" OR "Neck pains" OR "Neck Ache" OR "NeckAches" OR "Cervicalgia" OR "Cervicalgias" OR "Cervicodynia" OR "Cervicodynias" OR "Cervical Pain" OR "Cervical Pains" OR "Posterior Cervical Pain" OR "Posterior Cervical Pains" OR "Posterior Neck Pain" OR "Posterior Neck Pains" OR "Anterior Cervical Pain" OR "Anterior Cervical Pains" OR "Posterior Neck Pain" OR "Posterior Neck Pains" OR "Shoulder pain" OR "Shoulder pain" OR "Shoulder pains")</p> <p>2. TITLE-ABS-KEY("Office Work" OR "Office Worker" OR "Office Workers" OR "Desk Worker" OR "Desk Workers" OR "Computer Work" OR "Computer Workers" OR "Nonmanual Workers" OR "Administrative Personnel" OR "sedentary workers" OR "sedentary personnel" OR "sedentary employees" OR "Work Performance" OR "Work Performances" OR "Job Performance" OR "Job Performances" OR "Occupational Diseases" OR "Occupational Disease*" OR "Occupational Illness*" OR "Administrative Personnel" OR "White Collar Worker" OR "Administrative Worker" OR "Corporate Workers" OR "Video Display terminal workers" OR "Video Display Visual operators" OR "Clerical workers")</p> <p>3. TITLE-ABS-KEY("Exercise movement Therapy" OR "Exercise Therapy" OR "Circuit Based Exercise" OR "Stretching Exercise" OR Yoga OR "Pilates Training" OR "Active Rest" OR "Active Rests" OR "Active Pause" OR "Active Pauses" OR "Active Break" OR "Active Breaks" OR "Exercise Therapies" OR "Remedial Exercise" OR "Remedial Exercises" OR "Rehabilitation Exercise" OR "Rehabilitation Exercises" OR "Incidental Physical activity" OR "Standing breaks" OR "Stretching breaks" OR "Mobility exercise" OR "Workplace exercise intervention")</p> <p>4. 1 AND 2 AND 3</p> <p>- Filters/Limits: Publication Date = 1 January 2020 to 31 December 2020; Language = English and Spanish only</p> |
| ISI WoS | <p>1. (Musculoskeletal Illness OR Musculoskeletal Pain OR Musculoskeletal Pain OR Musculoskeletal Disease OR Musculoskeletal Diseases OR Musculoskeletal Disorder OR Musculoskeletal Disorders OR Musculoskeletal Disfunction OR Musculoskeletal Disfunctions OR Low back pain OR Low back pains OR Lumbago OR Lower Back Pain OR Lower Back pains OR Low Back Ache OR Low Back Aches OR Low Backache OR Low Backaches OR Postural Low back pain OR Posterior Compartment Low back pain OR</p>                                                                                                                                                                                                                                                                                                                                                                                                                                                                                                                                                                                                                                                                                                                                                                                                                                                                                                                                                                                                                                                                                                                                                                                                                                                                                                                                                                                                                                                                                                                                                                                                                                                                                                                                                                                                                                                                                                                                                           |

|       |                                                                                                                                                                                                                                                                                                                                                                                                                                                                                                                                                                                                                                                                                                                                                                                                                                                                                                                                                                                                                                                                                                                                                                                                                                                                                                                                                                                                                                                                                                                                                                                                                                                                                                                 |
|-------|-----------------------------------------------------------------------------------------------------------------------------------------------------------------------------------------------------------------------------------------------------------------------------------------------------------------------------------------------------------------------------------------------------------------------------------------------------------------------------------------------------------------------------------------------------------------------------------------------------------------------------------------------------------------------------------------------------------------------------------------------------------------------------------------------------------------------------------------------------------------------------------------------------------------------------------------------------------------------------------------------------------------------------------------------------------------------------------------------------------------------------------------------------------------------------------------------------------------------------------------------------------------------------------------------------------------------------------------------------------------------------------------------------------------------------------------------------------------------------------------------------------------------------------------------------------------------------------------------------------------------------------------------------------------------------------------------------------------|
|       | <p>Recurrent Low back pain OR Mechanical Low back pain OR Neck pain OR Neck pains OR Neck Ache OR NeckAches OR Cervicalgia OR Cervicalgias OR Cervicodynia OR Cervicodynias OR Cervical Pain OR Cervical Pains OR Posterior Cervical Pain OR Posterior Cervical Pains OR Posterior Neck Pain OR Posterior Neck Pains OR Anterior Cervical Pain OR Anterior Cervical Pains OR Posterior Neck Pain OR Posterior Neck Pains OR Shoulder pain OR Shoulder pain OR Shoulder pains)</p> <p>2. (Office Work OR Office Worker OR Office Workers OR Desk Worker OR Desk Workers OR Computer Work OR Computer Workers OR Nonmanual Workers OR Administrative Personnel OR Sedentary workers OR Sedentary personnel OR Sedentary employees OR Work Performance OR Work Performances OR Job Performance OR Job Performances OR Occupational Disease* OR Occupational Illness* OR Administrative Personnel OR White Collar Worker OR Administrative Worker OR Corporate Workers OR Video Display terminal workers OR Video Display Visual operators OR Clerical workers)</p> <p>3. (Exercise movement Therapy OR Exercise Therapy OR Circuit Based Exercise OR Stretching Exercise OR Yoga OR Pilates Training OR Active Rest OR Active Rests OR Active Pause OR Active Pauses OR Active Break OR Active Breaks OR Exercise Therapies OR Remedial Exercise OR Remedial Exercises OR Rehabilitation Exercise OR Rehabilitation Exercises OR Incidental Physical activity OR Standing Breaks OR Stretching Breaks OR Mobility Exercise OR Workplace Exercise Intervention)</p> <p>4. 1 AND 2 AND 3 AND</p> <p>- Filters/Limits: Publication Date = 1 January 2020 to 31 December 2020; Language = English and Spanish only</p> |
| PeDRO | <p>A simple search of the different terms and their synonyms:</p> <ol style="list-style-type: none"> <li>1. Musculoskeletal Disorders</li> <li>2. Office workers</li> <li>3. Exercise Therapy</li> </ol>                                                                                                                                                                                                                                                                                                                                                                                                                                                                                                                                                                                                                                                                                                                                                                                                                                                                                                                                                                                                                                                                                                                                                                                                                                                                                                                                                                                                                                                                                                        |
